# Supplementary material for: Genome Editing of Rice eIF4G Loci Confers Partial Resistance to Rice Black-Streaked Dwarf Virus
Source: MDPI journal article supplement (doi:10.3390/v13102100), 2021-10-18
Supplement: s1 [file s1]

**Table S1.** Primers sequences used for cloning of transgenes and testing the viral infection.

| Gene           | Primers                                                                                                                          | Product Size (bp) | tests         |
|----------------|----------------------------------------------------------------------------------------------------------------------------------|-------------------|---------------|
| <i>eIF4G</i>   | 5'-GGCGAGGGATTTATGTCCCAGCG-3'<br>5'-CGCTGGGACATAAAATCCCTCAA-3'                                                                   | oligo             | CRISPR clone  |
| <i>eIF4G</i>   | 5'-CAAGGTTTCGCTCCCCTTTTTTCCC-3'<br>5'-GGAGCTGAGCTTGTCTGGCAGGGA-3'                                                                | 1620              | PCR           |
| <i>eIF4G-N</i> | 5'-GGGGACAAGTTTGTACAAAAAAGCAGG<br>CTTCTATGTCCCAGCGAGGGGACAGG-3'<br>5'-GGGGACCACTTTGTACAAGAAAGCTGGGT<br>CTTATTGATGATGGTGCTGAAT-3' | 1053              | Gateway clone |
| <i>P8</i>      | 5'-GGGGACAAGTTTGTACAAAAAAGCAGG<br>CTTCTATGACTGGCACCCATGACGA-3'<br>5'-GGGGACCACTTTGTACAAGAAAGCTGGGT<br>CTACAATAATCGAGGAAGCTT-3'   | 1773              | Gateway clone |
| <i>P9-1</i>    | 5'-AAGAGCGGAGAACGTTTGGA-3'<br>5'-CGAAGATGCCGTCATCGAGT-3'                                                                         | 150               | qRT-PCR       |
| <i>eIF4G</i>   | 5'-CCTGGGATGCCCATGTCAAT-3'<br>5'-TGCATCATTGTTGGCGGTTG-3'                                                                         | 209               | qRT-PCR       |
| <i>SP</i>      | 5'-TTGTCACTCATTCTTATCACACCTG-3'<br>5'-TTCTTCCACACTTTCTCATACTCTT-3'                                                               | 237               | qRT-PCR       |
| <i>UBQ10</i>   | 5'-TGGTCAGTAATCAGCCAGTTTGG-3'<br>5'-GCACCACAAATACTTGACGAACAG-3'                                                                  | 65                | qRT-PCR       |
| <i>Cas9</i>    | 5'-AAAGACCGAGGTGCAGACAG-3'<br>5'-CGATCCGTGTCTCGTACAGG-3'                                                                         | 794               | PCR           |

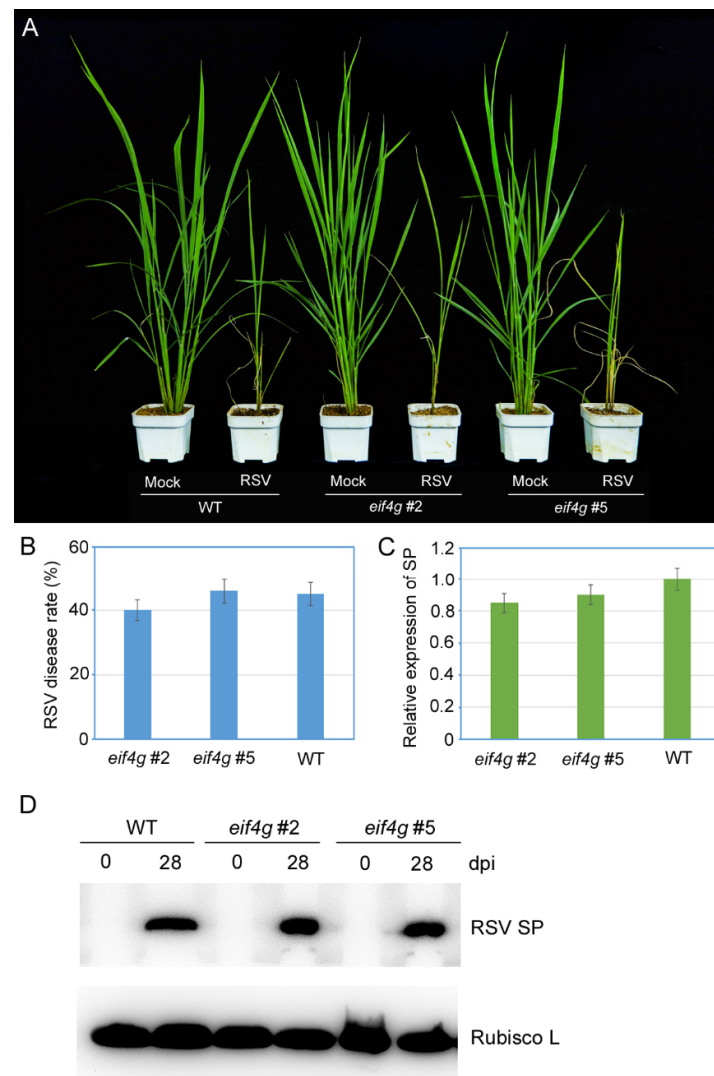

**Figure S1.** Evaluation of rice stripe virus (RSV) resistance of rice *eif4g* mutant lines. (A) Disease symptoms of mock-inoculated and RSV-infected *eif4g* mutant lines (*eif4g* #2, *eif4g* #5) and wild-type (WT, Nipponbare) rice plants. Photographs were taken at 28 days postinoculation (dpi). (B) Incidence of RSV disease rate in *eif4g* mutant lines (*eif4g* #2, *eif4g* #5) and wild-type (WT, Nipponbare) rice plants at 28 dpi. (C) qRT-PCR analysis of RSV SP mRNA transcription levels in *eif4g* mutant lines (*eif4g* #2, *eif4g* #5) and WT rice plants at 28 dpi. Signal intensities for each transcript were normalized to the signal intensity for UBQ. (D) Western blot analysis of RSV-encoded SP protein accumulation in virus-infected *eif4g* mutant lines (*eif4g* #2, *eif4g* #5) and wild-type (WT, Nipponbare) rice plants using a SP-specific antibody. The rubisco large subunit level served as a loading control. Rice plants were all collected at 28 dpi. All data are means  $\pm$  SD ( $n = 3$ ).
